# Supplementary material for: Genetic Evidence Supporting Fibroblast Growth Factor 21 Signalling as a Pharmacological Target for Cardiometabolic Outcomes and Alzheimer’s Disease
Source: MDPI journal article supplement (doi:10.3390/nu13051504), 2021-04-29
Supplement: s1 [file s1]

**Table S1.** Data sources for the outcome phenotypes included in the present Mendelian randomization study.

| Outcome phenotype*                  | ID for the outcomes obtained through the MR Base platform or name of the outcome in FinnGen         | Study or consortium | Sample size or cases/controls | First author and reference |
|-------------------------------------|-----------------------------------------------------------------------------------------------------|---------------------|-------------------------------|----------------------------|
| <b><i>Macronutrient/alcohol</i></b> |                                                                                                     |                     |                               |                            |
| Total sugar intake†                 | ukb-b-17079; 100008: Output from GWAS pipeline using Phesant derived variables from UKBB (MRC-IEU)  | UKBB                | 64,979                        | Hemani, 2018 [15]          |
| Carbohydrate intake†                | ukb-b-7244; 100005: Output from GWAS pipeline using Phesant derived variables from UKBB (MRC-IEU)   | UKBB                | 64,979                        | Hemani, 2018 [15]          |
| Protein intake†                     | ukb-b-12043; 100003: Output from GWAS pipeline using Phesant derived variables from UKBB (MRC-IEU)  | UKBB                | 64,979                        | Hemani, 2018 [15]          |
| Fat intake†                         | ukb-b-12379; 100004: Output from GWAS pipeline using Phesant derived variables from UKBB (MRC-IEU)  | UKBB                | 64,979                        | Hemani, 2018 [15]          |
| Alcohol intake†                     | ukb-b-5359; 100022: Output from GWAS pipeline using Phesant derived variables from UKBB (MRC-IEU)   | UKBB                | 64,979                        | Hemani, 2018 [15]          |
| <b><i>Anthropometric trait</i></b>  |                                                                                                     |                     |                               |                            |
| Body mass index                     | NA                                                                                                  | GIANT+UKBB          | 708,052                       | Pulit, 2019 [20]           |
| Waist circumference                 | ukb-b-9405; 48: Output from GWAS pipeline using Phesant derived variables from UKBB (MRC-IEU)       | UKBB                | 462,166                       | Hemani, 2018 [15]          |
| Hip circumference                   | ukb-b-15590; 49: Output from GWAS pipeline using Phesant derived variables from UKBiobank (MRC-IEU) | UKBB                | 462,117                       | Hemani, 2018 [15]          |
| Waist-to-hip ratio                  | NA                                                                                                  | GIANT+UKBB          | 619,363                       | Pulit, 2019 [20]           |
| Body fat percentage                 | ukb-b-8909; 23099: Output from GWAS pipeline using Phesant derived variables from UKBB (MRC-IEU)    | UKBB                | 454,633                       | Hemani, 2018 [15]          |
| <b><i>Cardiometabolic trait</i></b> |                                                                                                     |                     |                               |                            |
| Fasting glucose                     | ebi-a-GCST005186                                                                                    | MAGIC               | 58,074                        | Manning, 2012 [13]         |

|                                       |                                                                                                   |                            |                 |                          |
|---------------------------------------|---------------------------------------------------------------------------------------------------|----------------------------|-----------------|--------------------------|
| Fasting insulin                       | ebi-a-GCST005185                                                                                  | MAGIC                      | 51,750          | Manning, 2012 [13]       |
| Triglycerides                         | ieu-a-302                                                                                         | GLGC                       | 177,861         | Willer, 2013 [14]        |
| LDL cholesterol                       | ieu-a-300                                                                                         | GLGC                       | 173,082         | Willer, 2013 [14]        |
| HDL cholesterol                       | ieu-a-299                                                                                         | GLGC                       | 187,167         | Willer, 2013 [14]        |
| Systolic blood pressure               | ukb-b-20175; 4080: Output from GWAS pipeline using Pheasant derived variables from UKBB (MRC-IEU) | UKBB                       | 436,419         | Hemani, 2018 [15]        |
| Diastolic blood pressure              | ukb-b-7992; 4079: Output from GWAS pipeline using Pheasant derived variables from UKBB (MRC-IEU)  | UKBB                       | 436,424         | Hemani, 2018 [15]        |
| C-reactive protein level              | NA                                                                                                | UKBB                       | 343,524         | Hemani, 2018 [15]        |
| <b><i>Liver enzyme/metabolite</i></b> |                                                                                                   |                            |                 |                          |
| Alanine aminotransferase              | ukb-d-30620_irnt                                                                                  | UKBB                       | NA              | Hemani, 2018 [15]        |
| Alkaline phosphatase                  | ukb-d-30610_irnt                                                                                  | UKBB                       | NA              | Hemani, 2018 [15]        |
| Aspartate aminotransferase            | ukb-d-30650_irnt                                                                                  | UKBB                       | NA              | Hemani, 2018 [15]        |
| Gamma glutamyltransferase             | ukb-d-30730_irnt                                                                                  | UKBB                       | NA              | Hemani, 2018 [15]        |
| Direct bilirubin                      | ukb-d-30660_irnt                                                                                  | UKBB                       | NA              | Hemani, 2018 [15]        |
| Total bilirubin                       | ukb-d-30840_irnt                                                                                  | UKBB                       | NA              | Hemani, 2018 [15]        |
| <b><i>Cardiometabolic disease</i></b> |                                                                                                   |                            |                 |                          |
| Coronary artery disease               | ebi-a-GCST005195                                                                                  | CARDIoGRAMplusC4D and UKBB | 122,773/424,528 | van der Harst, 2018 [16] |
| Coronary artery disease               | I9_IHD                                                                                            | FinnGen consortium         | 25,366/151,533  | NA [21]                  |
| Heart failure                         | NA                                                                                                | HERMES (incl. UKBB)        | 41,734/930,298  | Shah, 2020[24]           |
| Heart failure                         | I9_HEARTFAIL                                                                                      | FinnGen consortium         | 9576/159,286    | NA [21]                  |

|                              |                                         |                       |                 |                    |
|------------------------------|-----------------------------------------|-----------------------|-----------------|--------------------|
| Atrial fibrillation          | ebi-a-GCST006414                        | NA (incl. UKBB)       | 60,620/970,216  | Nielsen, 2018 [17] |
| Atrial fibrillation          | I9_AF                                   | FinnGen consortium    | 17,325/97,214   | NA [21]            |
| Ischemic stroke              | NA                                      | MEGASTROKE            | 34,217/406,111  | Malik, 2018 [18]   |
| Ischemic stroke              | ukb-d-I9_STR_EXH                        | UKBB                  | 3314/357,880    | Hemani, 2018 [15]  |
| Ischemic stroke              | I9_STR_EXH                              | FinnGen consortium    | 8046/164,286    | NA [21]            |
| Venous thromboembolism       | ukb-d-I9_VTE                            | UKBB                  | 4620/356,574    | Hemani, 2018 [15]  |
| Venous thromboembolism       | I9_VTE                                  | FinnGen consortium    | 6913/169,986    | NA [21]            |
| Type 2 diabetes              | NA                                      | DIAMANTE (incl. UKBB) | 74,124/824,006  | Mahajan, 2018 [19] |
| Type 2 diabetes              | E4_DM2_STRICT (exclude type 1 diabetes) | FinnGen consortium    | 22,338/148,190  | NA [21]            |
| <b><i>Other outcomes</i></b> |                                         |                       |                 |                    |
| Alzheimer's disease          | NA                                      | Consortia‡ and UKBB   | 71,880/383,378§ | Jansen, 2019 [22]  |
| Parental lifespan            | NA                                      | LifeGene and UKBB     | 639,143         | Timmers, 2019 [23] |

CARDiOGRAMplusC4D, Coronary ARtery DIsease Genome wide Replication and Meta-analysis plus Coronary Artery Disease Genetics; DIAMANTE, DIAbetes Meta-ANalysis of Trans-Ethnic association studies; GIANT, Genetic Investigation of ANthropometric Traits; GLGC, Global Lipids Genetics Consortium; HDL, high-density lipoprotein; HERMES, Heart Failure Molecular Epidemiology for Therapeutic Targets; ICBP, International Consortium of Blood Pressure; LDL, low-density lipoprotein; MAGIC, Meta-Analyses of Glucose and Insulin-related traits Consortium; NA, not available; UK Biobank, UKBB.

\*The genetic association summary statistics estimates were extracted from the MR-Base platform [15], publicly available genetic consortia data, or the last public release (R4) of the FinnGen consortium [21].

†Estimated nutrient intake based on UKBB participants' answers to the dietary questionnaire.

‡Three independent consortia, including Alzheimer's disease working group of the Psychiatric Genomics Consortium (PGC-ALZ), the International Genomics of Alzheimer's Project (IGAP), and the Alzheimer's Disease Sequencing Project (ADSP).

§The dataset consists of 24,087 clinically diagnosed late-onset Alzheimer's disease cases, paired with 55,058 controls plus the AD-by-proxy phenotype, based on individuals in the UK Biobank (UKB) for whom parental Alzheimer's disease status was available (proxy cases = 47,793; proxy controls = 328,320).
